1  
2  
3  
4  
5  
6  
7  
8  
9  
10  
11  
12  
13  
14  
15  
16  
17  
18  
19  
20  
21  
22

# Evolution of transmissible spongiform encephalopathy and the prion protein gene (*PRNP*) in mammals

Brittaney L. Buchanan<sup>1\*</sup> and Robert M. Zink<sup>1,2,3</sup>

<sup>1</sup> School of Natural Resources, University of Nebraska-Lincoln, Lincoln, NE, 68583

<sup>2</sup> School of Biological Sciences, University of Nebraska-Lincoln, Lincoln, NE, 68583

<sup>3</sup> Nebraska State Museum, University of Nebraska-Lincoln, Lincoln, NE, 68583

\*Corresponding Author: Brittaney L. Buchanan

E-mail: [buchananbl55@gmail.com](mailto:buchananbl55@gmail.com) (BLB)

## 23 **Abstract**

24 Wildlife managers are concerned with transmissible spongiform encephalopathies (TSEs) as they  
25 are currently incurable, always fatal, and have the potential to cross species boundaries.

26 Although a wide range of mammals exhibit TSEs, it is currently unclear whether they are  
27 evolutionarily clustered or if TSE+ species are randomly distributed phylogenetically. We tested  
28 whether mammalian species with TSEs are phylogenetically underdispersed on a tree derived  
29 from 102 PRNP sequences obtained from the Orthologous Mammalian Markers database. We  
30 determined that the PRNP tree was topologically congruent with a species tree for these same  
31 102 taxa constructed from 20 aligned gene sequences, excluding the PRNP sequence. Searches  
32 in Google Scholar were done to determine whether a species is known to have expressed a TSE.  
33 TSEs were present in a variety of orders excluding Chiroptera, Eulipotyphyla, and Lagomorpha  
34 and no marine mammals (Artiodactyla) were recorded to have a TSE. We calculated the  
35 phylogenetic signal of binary traits (D-Value) to infer if the phylogenetic distribution of TSEs  
36 are conserved or dispersed. The occurrence of TSEs in both trees is non-random (Species tree  
37 D-value = 0.291; PRNP tree D-value = 0.273), and appears to have arisen independently in the  
38 recent history of different mammalian groups. Our findings suggest that the evolution of TSEs  
39 develops in groups of species irrespective of PRNP genotype. The evolution of TSEs merits  
40 continued exploration at a more in-depth phylogenetic level, as well as the search for genetic  
41 combinations that might underlie TSE diseases.

42

43

44

## 45 **Introduction**

46 Wildlife managers are concerned with transmissible spongiform encephalopathies (TSEs)  
47 as they are currently incurable, always fatal, and have the potential to cross species boundaries.  
48 Known TSEs include chronic wasting disease (CWD) in cervids, scrapie in sheep, bovine  
49 spongiform encephalopathy (BSE, also known as mad cow disease), transmissible mink  
50 encephalopathy (TME), feline spongiform encephalopathy (FSE) and Creutzfeld-Jacob in  
51 humans [1-3]. In response to health concerns of livestock and humans, research has focused on  
52 learning how species contract TSEs, how they are spread, causes of immunity, and prevention or  
53 cures [4].

54 Most researchers accept the hypothesis that resistance to TSEs in mammals results from  
55 certain genotypes found at the highly conserved prion protein gene (PRNP)[5]. TSEs are  
56 thought to be caused by the misfolding of the host's prion protein (*PrP*) whose primary  
57 physiological function is not entirely clear. When correctly folded the prion protein has been  
58 theorized to localize at synaptic membranes and be related to normal synaptic functioning, signal  
59 transduction, and copper binding [6-9]. When misfolded the protein induces other prion proteins  
60 to misfold as well, followed by ultimately fatal accumulation in the central nervous system  
61 within the host [1, 5, 10]. Misfolded prion proteins can be spontaneously generated [4, 11] or  
62 introduced to the host by inoculation from the environment or through direct contact with  
63 infected individuals [5, 12]. Differences in mammalian prion proteins might reduce  
64 transmissibility between species because they function as a species barrier [5, 13].

65 A wide range of mammalian species exhibit TSEs, and it is currently unclear whether  
66 they are evolutionarily clustered, or whether TSE+ species are randomly distributed  
67 phylogenetically. If a species barrier inhibits horizontal transfer of TSEs, one might predict that

68 related species would exhibit greater susceptibility to TSE expression. The reasoning for this  
69 prediction is that phylogenetically more distant relatives would be less similar genetically and,  
70 therefore, less susceptible to horizontal (cross-species) transmission. A phylogenetic test  
71 involves constructing a tree from PRNP sequences and testing whether species with TSEs are  
72 phylogenetically underdispersed, or clumped within clades [14]. In addition, because the PRNP  
73 gene might be under strong selection, it is important to document that the PRNP tree was  
74 topologically congruent with one that was not constructed with PRNP data. If the topology of  
75 the two trees differ significantly, it would suggest that selection has constrained the evolution the  
76 PRNP gene. If the presence of TSEs is phylogenetically clustered, and the two trees are more  
77 similar than one would expect by chance, it can be inferred that some lineages are predisposed,  
78 perhaps by their genetics, to acquiring this class of diseases. If TSEs are phylogenetically  
79 dispersed, and the two trees are similar, it would suggest that factors other than shared history  
80 explain the distribution of TSEs in mammalian taxa. Therefore, we have two objectives: 1)  
81 Determine if a mammalian species tree and PRNP gene tree have similar topologies and, 2)  
82 Determine if the presence of TSEs are phylogenetically dispersed in a species tree.

83

## 84 **Materials and methods**

85 We used 102 aligned mammal sequences (Table S1) obtained from the Orthologous  
86 Mammalian Markers database (OrthoMam)[15]. In all phylogenic analyses, the platypus  
87 (*Ornithorhynchus anatinus*) was used as the outgroup. To determine whether a species is known  
88 to have a TSE, searches in Google Scholar were done using the scientific and common name of  
89 species combined with “TSE”, “transmissible spongiform encephalopathy”, “prion disease”,  
90 “CWD”, “chronic wasting”, “BSE”, “bovine spongiform”, “FSE”, “feline spongiforme”, “MSE”,

91 and “mink spongiform”. Specific prion diseases were included in our search to broaden our list  
92 of taxa (Table S1). Many species appeared to have ambiguous evidence for TSE presence (Table  
93 S1), and we conservatively scored them as absent. Some species known to express TSEs lacked  
94 gene sequences that would have permitted including them in the species tree (e.g., moose, *Alces*  
95 *alces*, caribou, *Rangifer tarandus*, elk, *Cervus canadensis*, mule deer *Odocoileus hemonius*).

96 In addition to analyzing the aligned sequences available on Orthomam, we computed  
97 alternative alignments on the nucleotide data. We aligned sequences three separate ways in  
98 MEGA X [16] the default MUSCLE settings, the default MUSCLE settings followed with the  
99 program Gblocks [17-18] under stringent conditions to eliminate poorly aligned positions, and  
100 running the available Orthomam alignments only through Gblocks. The results of performing  
101 these alignment methods are the same as using aligned Orthomam sequences as-is. In addition,  
102 we constructed a phylogenetic tree using sequences of amino acids to determine if particular  
103 protein structures were associated with TSE+ species.

104

## 105 **Phylogeny construction**

106 To construct a species tree independent of the PRNP gene, we selected 20 aligned gene  
107 sequences of coding regions (Table S2) for 102 species of mammals spanning 20 orders, 58  
108 families, and 85 genera, and for which evidence of TSE presence/absence was available (Table  
109 S1). Using the aligned nucleotide coding regions, partitioned (by gene) analyses were run using  
110 the Bayesian Evolutionary Analysis by Sampling Trees 2 (BEAST 2) package [19]. The  
111 sequences were analyzed using the best fit model (HKY + G) identified using MEGA X [16].  
112 We ran the analyses for 75,000,000 generations while sampling every 5,000 chains under a strict  
113 clock model and Yule speciation model. The first 10% of sampled trees were discard as burn-in.

114 Two independent runs were performed with these specifications, and log files were combined in  
115 LogCombiner [20] to address low Effective Sample Size (ESS) values of parameters. Resulting  
116 trees were re-rooted to the platypus and exported as Nexus and Newick files. The PRNP gene  
117 tree was constructed using the same procedures as the species tree, with the best fit model  
118 identified as TN93 + G + I. To construct the PRNP gene tree, analyses ran for 10,000,000  
119 generations while sampling every 5,000 chains under a relaxed log normal clock model and Yule  
120 model, along with three independent runs that were combined in LogCombiner [20]. The  
121 phylogenetic analysis of amino acids residues, obtained from Orthomam, followed the same  
122 protocol as the two preceding analyses. The amino acid PRNP gene tree had the same  
123 specifications as the nucleotide species tree with the best fit model identified as JTT + G and had  
124 three independent runs that were combined.

125 We mapped the presence or absence of TSE on the two trees using stochastic character  
126 mapping [21], which samples character histories based on their posterior probability distribution;  
127 we reconstructed the ancestral states using the equal rates model (run in Program R; version  
128 3.5.2, R Development Core Team, 2018, Code S4). All analyses were done using the R package  
129 *phytools* version 0.6-99 [22]. The function *cophylo* was used to compare the species and gene  
130 tree. We also calculated the phylogenetic signal of binary traits (D-value) to infer if the  
131 phylogenetic distribution of TSEs are conserved or dispersed [23]. D-values close to 0 are not  
132 randomly distributed and are conserved, where if the value is close to 1 then the presence of the  
133 state is considered randomly distributed on the tree.

134

135

## 136 **Results**

## 137 **Basic genetic results**

138           The number of aligned base pairs ranged from 324 (*Monodelphis domesticus*) to 783 (*Bos*  
139 *taurus*, *Bos mutus*, *Bison bison*), and the total alignment included 861 base pairs, of which 486  
140 were variable. Of the 287 total amino acids (no stop codons were noted), 166 were variable.  
141 Nucleotide composition differed little between species with and without TSE (Table S3). No  
142 amino acid positions separated TSE+ from TSE- species.

143

## 144 **Species and PRNP trees**

145           Most of the internal nodes in the species tree (Fig. 1) were well supported with posterior  
146 probabilities over 0.90, with a few exceptions close to the terminal tips (Fig 1). The topology is  
147 consistent with current taxonomy, at least to the extent that species from the same orders are  
148 supported as clades. In contrast, the PRNP gene tree has relatively few strongly supported nodes  
149 (Fig 1), although the topology is also consistent with current mammalian ordinal taxonomy.  
150 Both trees are topologically congruent, with most of the discrepancies occurring at poorly  
151 supported nodes deep in the trees (Fig 1). The tree constructed from amino acids (Fig 2) is  
152 congruent with both the species and PRNP trees.

153

154 **Fig 1. Species Tree (left) and PRNP Gene Tree (right) Comparison using Nucleotides.**  
155 Compiled using 20 autosomal genes and rooted with platypus (excluded from figure). Positive  
156 TSE presence (red) and absence TSE (blue) shown at tips with orders that contain 2 or more  
157 species labeled. Posterior probabilities less than 0.90 and stochastic character mapping  
158 probabilities (as pies) displayed at nodes. Congruent tips are connected by solid lines, whereas  
159 topological differences between the trees are connected by dashed lines.

160

161 **Fig 2. PRNP Gene Tree Created using Amino Acids.** Compiled using the translated PRNP  
162 gene and rooted with platypus (excluded from figure). Positive TSE presence (red) and absence  
163 TSE (blue) shown at tips with orders that contain 2 or more species labeled. Posterior

164 probabilities less than 0.90 and stochastic character mapping probabilities (as pies) displayed at  
165 nodes.  
166

## 167 **Reconstruction of TSE evolution**

168         Because of the congruence of the two trees, we focused on the results from the species  
169 tree. TSEs are present in a variety of orders excluding Chiroptera, Eulipotyphyla, and  
170 Lagomorpha. No marine mammals (Artiodactyla) have been recorded to have a TSE. According  
171 to the ancestral reconstruction, TSEs appear to have arisen relatively recently in TSE+ groups,  
172 with the basal condition being absence of TSEs. The reconstruction of TSE evolution is also  
173 notable in that there was only one hypothesized transition from TSE presence to absence  
174 (Tibetan antelope, *Pantholops hodgsonii*). The presence of TSEs is non-random (D-value =  
175 0.291), suggesting that TSE presence is relatively conserved. Therefore, the distribution of TSEs  
176 is not randomly distributed across the phylogeny (Fig. 3). The results for the PRNP gene alone  
177 were identical to the results inferred from the species tree.

178

179 **Fig 3. Density plot of scaled observed value of D for the species tree.** The observed value of  
180 D for the species tree (D = 0.291) in black compared to simulated values of D = 0 (blue),  
181 representing the traits being phylogenetically conserved as expected under a Brownian threshold  
182 model (p = 0.115), and D = 1 (red) as the traits being phylogenetically random under a Brownian  
183 threshold (p = 0). PRNP tree has similar results (not shown) with observed value of D = 0.273. P  
184 = 0.135 for the simulated value of D = 0, and a p = 0 for the simulated value of D = 1.

185

## 186 **Discussion**

187         Our species tree and the tree inferred solely from the PRNP gene (Fig. 1) closely match  
188 accepted mammalian phylogenetic trees [24-28]. Therefore, our species tree provides a glimpse  
189 into the evolution of TSEs. The occurrence of TSEs is not randomly distributed across the  
190 mammal phylogeny. TSEs appear to have arisen independently and recently in several major



191 mammalian groups whereas they are absent in others; had information for the 20 genes been  
192 available, a group of cervid species (e.g., moose, caribou, elk), all which exhibit TSEs, would  
193 have been clustered with *Odocoileus virginianus*. The lack of amino acid substitutions unique to  
194 all TSE+ or TSE- species suggests there is not a particular set of amino acid substitutions that  
195 either provides resistance or susceptibility. In sheep amino acids positions relevant to scrapie  
196 resistance are 136 (A/V), 154 (R/H) and 171 (Q/R/H), with the 136A/154R/171R genotype  
197 conferring complete or nearly complete resistance [29]. We did not find this genotype in any  
198 other mammalian taxa. Our ancestral reconstructions included only one instance of a reversal  
199 from TSE presence to absence, suggesting that mutations conferring resistance are relatively  
200 rare. The nonrandom occurrence of TSEs in some mammalian orders (e.g., rodents, bovids,  
201 felines, cervids) suggest that TSEs are a recently evolved class of mammalian disease, which  
202 could explain why TSEs are nearly always fatal. Rongyan et al. (2008:650) suggested that “no  
203 dramatic sequence changes have occurred to avoid cross-species TSE infectivity.” Why TSEs  
204 are not more widespread across mammals is unclear at this time. It seems possible that the  
205 evolution of TSEs is independent of PRNP genotype.

206

207       Given the high fatality rates of TSEs, one might expect strong selection on the PRNP gene.  
208 Balancing selection in sheep [30] and strong purifying selection for PRNP CDS has been  
209 implicated in cattle [31]. In contrast, the congruence between trees reconstructed from  
210 nucleotides (Fig. 1) and amino acid residues (Fig. 2) suggests that selection has not yet played a  
211 major role in the evolution of the PRNP gene. That is, if there were a common PRNP genotype at  
212 the amino acid level that conferred resistance to TSEs, those species ought to have been grouped  
213 together on the amino acid tree in a way that conflicts with the species tree.

214

215 Reconstruction of TSE evolution suggests the ancestral state is the absence of TSEs (Fig. 1),  
216 and that certain orders of mammals are apparently at greater risk of developing or contracting  
217 these diseases. Alternatively, it is possible that our knowledge of the occurrence of TSEs is  
218 incomplete, and one interpretation of our analysis is that all mammalian orders are susceptible,  
219 which could be confirmed by more extensive testing. If TSEs are a relatively recent  
220 phenomenon in mammals, perhaps enough time has not passed for crossing of species-group  
221 barriers. Rongyan et al. (2008) noted that scrapie has been endemic in the United Kingdom for  
222 more than 200 years and yet has not crossed the species barrier into humans.

223

## 224 **Conclusions**

225 Understanding how diseases have evolved plays a crucial part in determining which  
226 species are currently most at risk, and if the possibility for others to become at risk is an  
227 immediate concern. Our findings show that the evolution of TSE+ species is localized, non-  
228 random, and recently developed in groups of species irrespective of PRNP genotype. As the  
229 PRNP gene has been associated with varying susceptibility to TSE diseases in past studies [11,  
230 32-34], future studies should focus on other genes. For example, in some cattle breeds and the  
231 gayal (*Bos frontalis*), a 23-bp deletion in the PRNP promoter region is associated with  
232 susceptibility to bovine spongiform encephalopathy (BSE) [35-36], although this was not found  
233 for white-tailed deer and mule deer (Zink et al. *in review*). Most research into TSEs has involved  
234 species such as cows, sheep, deer, rodents, and select primates, which could illuminate how  
235 TSEs could cross the species barrier into humans. However, as shown by our list of TSE+  
236 species (Table S1) there are many species that are as yet unstudied. Therefore, our list of TSE+

237 species could be incomplete. The evolution of TSEs merits continued exploration at a more in-  
238 depth phylogenetic level, as well as the search for genetic combinations that might underlie TSE  
239 diseases.

240

## 241 **Acknowledgments**

242 We thank Hernan Vazquez-Miranda for help in conceptualizing this project and advice  
243 on phylogenetic methods, along with Chris Chizinski and Jeffrey Lusk for their insight and  
244 helpful comments.

245

## 246 **References**

- 247 1. Imran M, Mahmood S. An overview of animal prion diseases. *Virology Journal* [Internet].  
248 2011 Dec [cited 2019 Feb 11];8(1). Available from:  
249 <https://virologyj.biomedcentral.com/articles/10.1186/1743-422X-8-493>.
- 250 2. Collinge J, Clarke AR. A General Model of Prion Strains and Their Pathogenicity. *Science*.  
251 2007 Nov 9;318(5852):930–6.
- 252 3. Aguilar-Calvo P, García C, Espinosa JC, Andreoletti O, Torres JM. Prion and prion-like  
253 diseases in animals. *Virus Research*. 2015 Sep;207:82–93.
- 254 4. Osterholm MT, Anderson CJ, Zabel MD, Scheftel JM, Moore KA, Appleby BS. Chronic  
255 Wasting Disease in Cervids: Implications for Prion Transmission to Humans and Other  
256 Animal Species. Relman DA, editor. *mBio* [Internet]. 2019 Jul 23 [cited 2019 Dec 5];10(4).  
257 Available from: <http://mbio.asm.org/lookup/doi/10.1128/mBio.01091-19>.

- 258 5. Rongyan Z, Xianglong L, Lanhui L, Xiangyun L, Fujun F. Evolution and Differentiation of  
259 the Prion Protein Gene (PRNP) among Species. *Journal of Heredity*. 2008;99(6):647–52.
- 260 6. Vassallo N, Herms J. Cellular prion protein function in copper homeostasis and redox  
261 signalling at the synapse: Cellular prion protein function. *Journal of Neurochemistry*. 2003  
262 Jun 27;86(3):538–44.
- 263 7. Roucou X, LeBlanc AC. Cellular prion protein neuroprotective function: implications in  
264 prion diseases. *Journal of Molecular Medicine*. 2005 Jan;83(1):3–11.
- 265 8. Collinge J, Whittington MA, Sidle KCL, Smith CJ, Palmer MS, Clarke AR, et al. Prion  
266 protein is necessary for normal synaptic function. *Nature*. 1994 Jul;370(6487):295–7.
- 267 9. Mouillet-Richard S. Signal Transduction Through Prion Protein. *Science*. 2000 Sep  
268 15;289(5486):1925–8.
- 269 10. Harrison PM, Khachane A, Kumar M. Genomic assessment of the evolution of the prion  
270 protein gene family in vertebrates. *Genomics*. 2010 May;95(5):268–77.
- 271 11. Sigurdson CJ, Nilsson KPR, Hornemann S, Heikenwalder M, Manco G, Schwarz P, et al. De  
272 novo generation of a transmissible spongiform encephalopathy by mouse transgenesis.  
273 *Proceedings of the National Academy of Sciences*. 2009 Jan 6;106(1):304–9.
- 274 12. Sigurdson CJ. A prion disease of cervids: Chronic wasting disease. *Veterinary Research*.  
275 2008 Jul;39(4):41.
- 276 13. Fernández-Borges N, Chianini F, Eraña H, Vidal E, Eaton SL, Pintado B, et al. Naturally  
277 prion resistant mammals. *Prion*. 2012 Nov 1;6(5):425–9.
- 278 14. Cavender-Bares J, Kozak KH, Fine PVA, Kembel SW. The merging of community ecology  
279 and phylogenetic biology. *Ecology Letters*. 2009 Jul;12(7):693–715.

- 280 15. Ranwez V, Delsuc F, Ranwez S, Belkhir K, Tilak M-K, Douzery EJ. OrthoMaM: A database  
281 of orthologous genomic markers for placental mammal phylogenetics. *BMC Evolutionary*  
282 *Biology*. 2007 Nov;7(1):241.
- 283 16. Kumar S, Stecher G, Li M, Knyaz C, Tamura K. MEGA X: Molecular Evolutionary Genetics  
284 Analysis across Computing Platforms. Battistuzzi FU, editor. *Molecular Biology and*  
285 *Evolution*. 2018 Jun 1;35(6):1547–9.
- 286 17. Castresana J. Selection of Conserved Blocks from Multiple Alignments for Their Use in  
287 Phylogenetic Analysis. *Molecular Biology and Evolution*. 2000 Apr 1;17(4):540–52.
- 288 18. Talavera G, Castresana J. Improvement of Phylogenies after Removing Divergent and  
289 Ambiguously Aligned Blocks from Protein Sequence Alignments. Kjer K, Page R, Sullivan  
290 J, editors. *Systematic Biology*. 2007 Aug 1;56(4):564–77.
- 291 19. Bouckaert R, Heled J, Kühnert D, Vaughan T, Wu C-H, Xie D, et al. BEAST 2: A Software  
292 Platform for Bayesian Evolutionary Analysis. *PLOS Computational Biology*. 2014;10(4):1–  
293 6.
- 294 20. Drummond AJ, Rambaut A. BEAST: Bayesian evolutionary analysis by sampling trees.  
295 *BMC Evol Biol*. 2007;7(1):214.
- 296 21. Huelsenbeck JP, Nielsen R, Bollback JP. Stochastic Mapping of Morphological Characters.  
297 Schultz T, editor. *Systematic Biology*. 2003 Apr 1;52(2):131–58.
- 298 22. Revell LJ. phytools: an R package for phylogenetic comparative biology (and other things):  
299 phytools: R package. *Methods in Ecology and Evolution*. 2012 Apr;3(2):217–23.
- 300 23. Fritz SA, Purvis A. Selectivity in Mammalian Extinction Risk and Threat Types: a New  
301 Measure of Phylogenetic Signal Strength in Binary Traits: Selectivity in Extinction Risk.  
302 *Conservation Biology*. 2010 Feb 22;24(4):1042–51.

- 303 24. Romiguier J, Ranwez V, Delsuc F, Galtier N, Douzery EJP. Less Is More in Mammalian  
304 Phylogenomics: AT-Rich Genes Minimize Tree Conflicts and Unravel the Root of Placental  
305 Mammals. *Molecular Biology and Evolution*. 2013 Sep;30(9):2134–44.
- 306 25. Esselstyn JA, Oliveros CH, Swanson MT, Faircloth BC. Investigating Difficult Nodes in the  
307 Placental Mammal Tree with Expanded Taxon Sampling and Thousands of Ultraconserved  
308 Elements. *Genome Biology and Evolution*. 2017 Sep;9(9):2308–21.
- 309 26. Prasad AB, Allard MW, NISC Comparative Sequencing Program, Green ED. Confirming the  
310 Phylogeny of Mammals by Use of Large Comparative Sequence Data Sets. *Molecular  
311 Biology and Evolution*. 2008 Sep 1;25(9):1795–808.
- 312 27. Liu L, Zhang J, Rheindt FE, Lei F, Qu Y, Wang Y, et al. Genomic evidence reveals a  
313 radiation of placental mammals uninterrupted by the KPg boundary. *Proceedings of the  
314 National Academy of Sciences*. 2017 Aug 29;114(35):E7282–90.
- 315 28. Murphy WJ, Pevzner PA, O'Brien SJ. Mammalian phylogenomics comes of age. *Trends in  
316 Genetics*. 2004 Dec;20(12):631–9.
- 317 29. Hagens TJ, Melchior MB, Windig JJ, Bossers A, Davidse A, van Zijderveld FG.  
318 Modelling of strategies for genetic control of scrapie in sheep: The importance of population  
319 structure. Gill AC, editor. *PLOS ONE*. 2018 Mar 27;13(3):e0195009.
- 320 30. Slate J. Molecular evolution of the sheep prion protein gene. *Proceedings of the Royal  
321 Society B: Biological Sciences*. 2005 Nov 22;272(1579):2371–7.
- 322 31. Seabury CM, Honeycutt RL, Rooney AP, Halbert ND, Derr JN. Prion protein gene (PRNP)  
323 variants and evidence for strong purifying selection in functionally important regions of  
324 bovine exon 3. *Proceedings of the National Academy of Sciences*. 2004 Oct  
325 19;101(42):15142–7.

- 326 32. Acín C, Martín-Burriel I, Monleón E, Lyahyai J, Pitarch JL, Serrano C, et al. Prion Protein  
327 Gene Variability in Spanish Goats. Inference through Susceptibility to Classical Scrapie  
328 Strains and Pathogenic Distribution of Peripheral PrPsc. Johnson CJ, editor. PLoS ONE.  
329 2013 Apr 8;8(4):e61118.
- 330 33. Aguilar-Calvo P, Espinosa JC, Pintado B, Gutierrez-Adan A, Alamillo E, Miranda A, et al.  
331 Role of the Goat K222-PrPC Polymorphic Variant in Prion Infection Resistance. Journal of  
332 Virology. 2014 Mar 1;88(5):2670–6.
- 333 34. Goldfarb LG, Brown P, McCombie WR, Goldgaber D, Swergold GD, Wills PR, et al.  
334 Transmissible familial Creutzfeldt-Jakob disease associated with five, seven, and eight extra  
335 octapeptide coding repeats in the PRNP gene. Proceedings of the National Academy of  
336 Sciences. 1991 Dec 1;88(23):10926–30.
- 337 35. Memon S, Li G, Xiong H, Wang L, Liu X, Yuan M, et al. Deletion / insertion  
338 polymorphisms of the prion protein gene (PRNP) in gayal (*Bos frontalis*). Journal of  
339 Genetics. 2018 Dec;97(5):1131–8.
- 340 36. Msalya G, Shimogiri T, Okamoto S, Kawabe K, Minezawa M, Namikawa T, et al. Gene and  
341 haplotype polymorphisms of the Prion gene ( PRNP ) in Japanese Brown, Japanese native  
342 and Holstein cattle. Animal Science Journal. 2009 Oct;80(5):520–7.

## 343 **Supporting information**

344 **S1 Table. List of species with a record of contracting a TSE or not with related references.**

345 **S2 Table. List of genes used for BEAST analysis, all gene sequences obtained from**

346 **Orthomam.**

347 **S3 Table: Nucleotide composition for the PRNP gene averaged by TSE+ and TSE- species**

348 **S4 Code: R Software (version 3.5.2) code used to visualize phylogenies and run analyses**



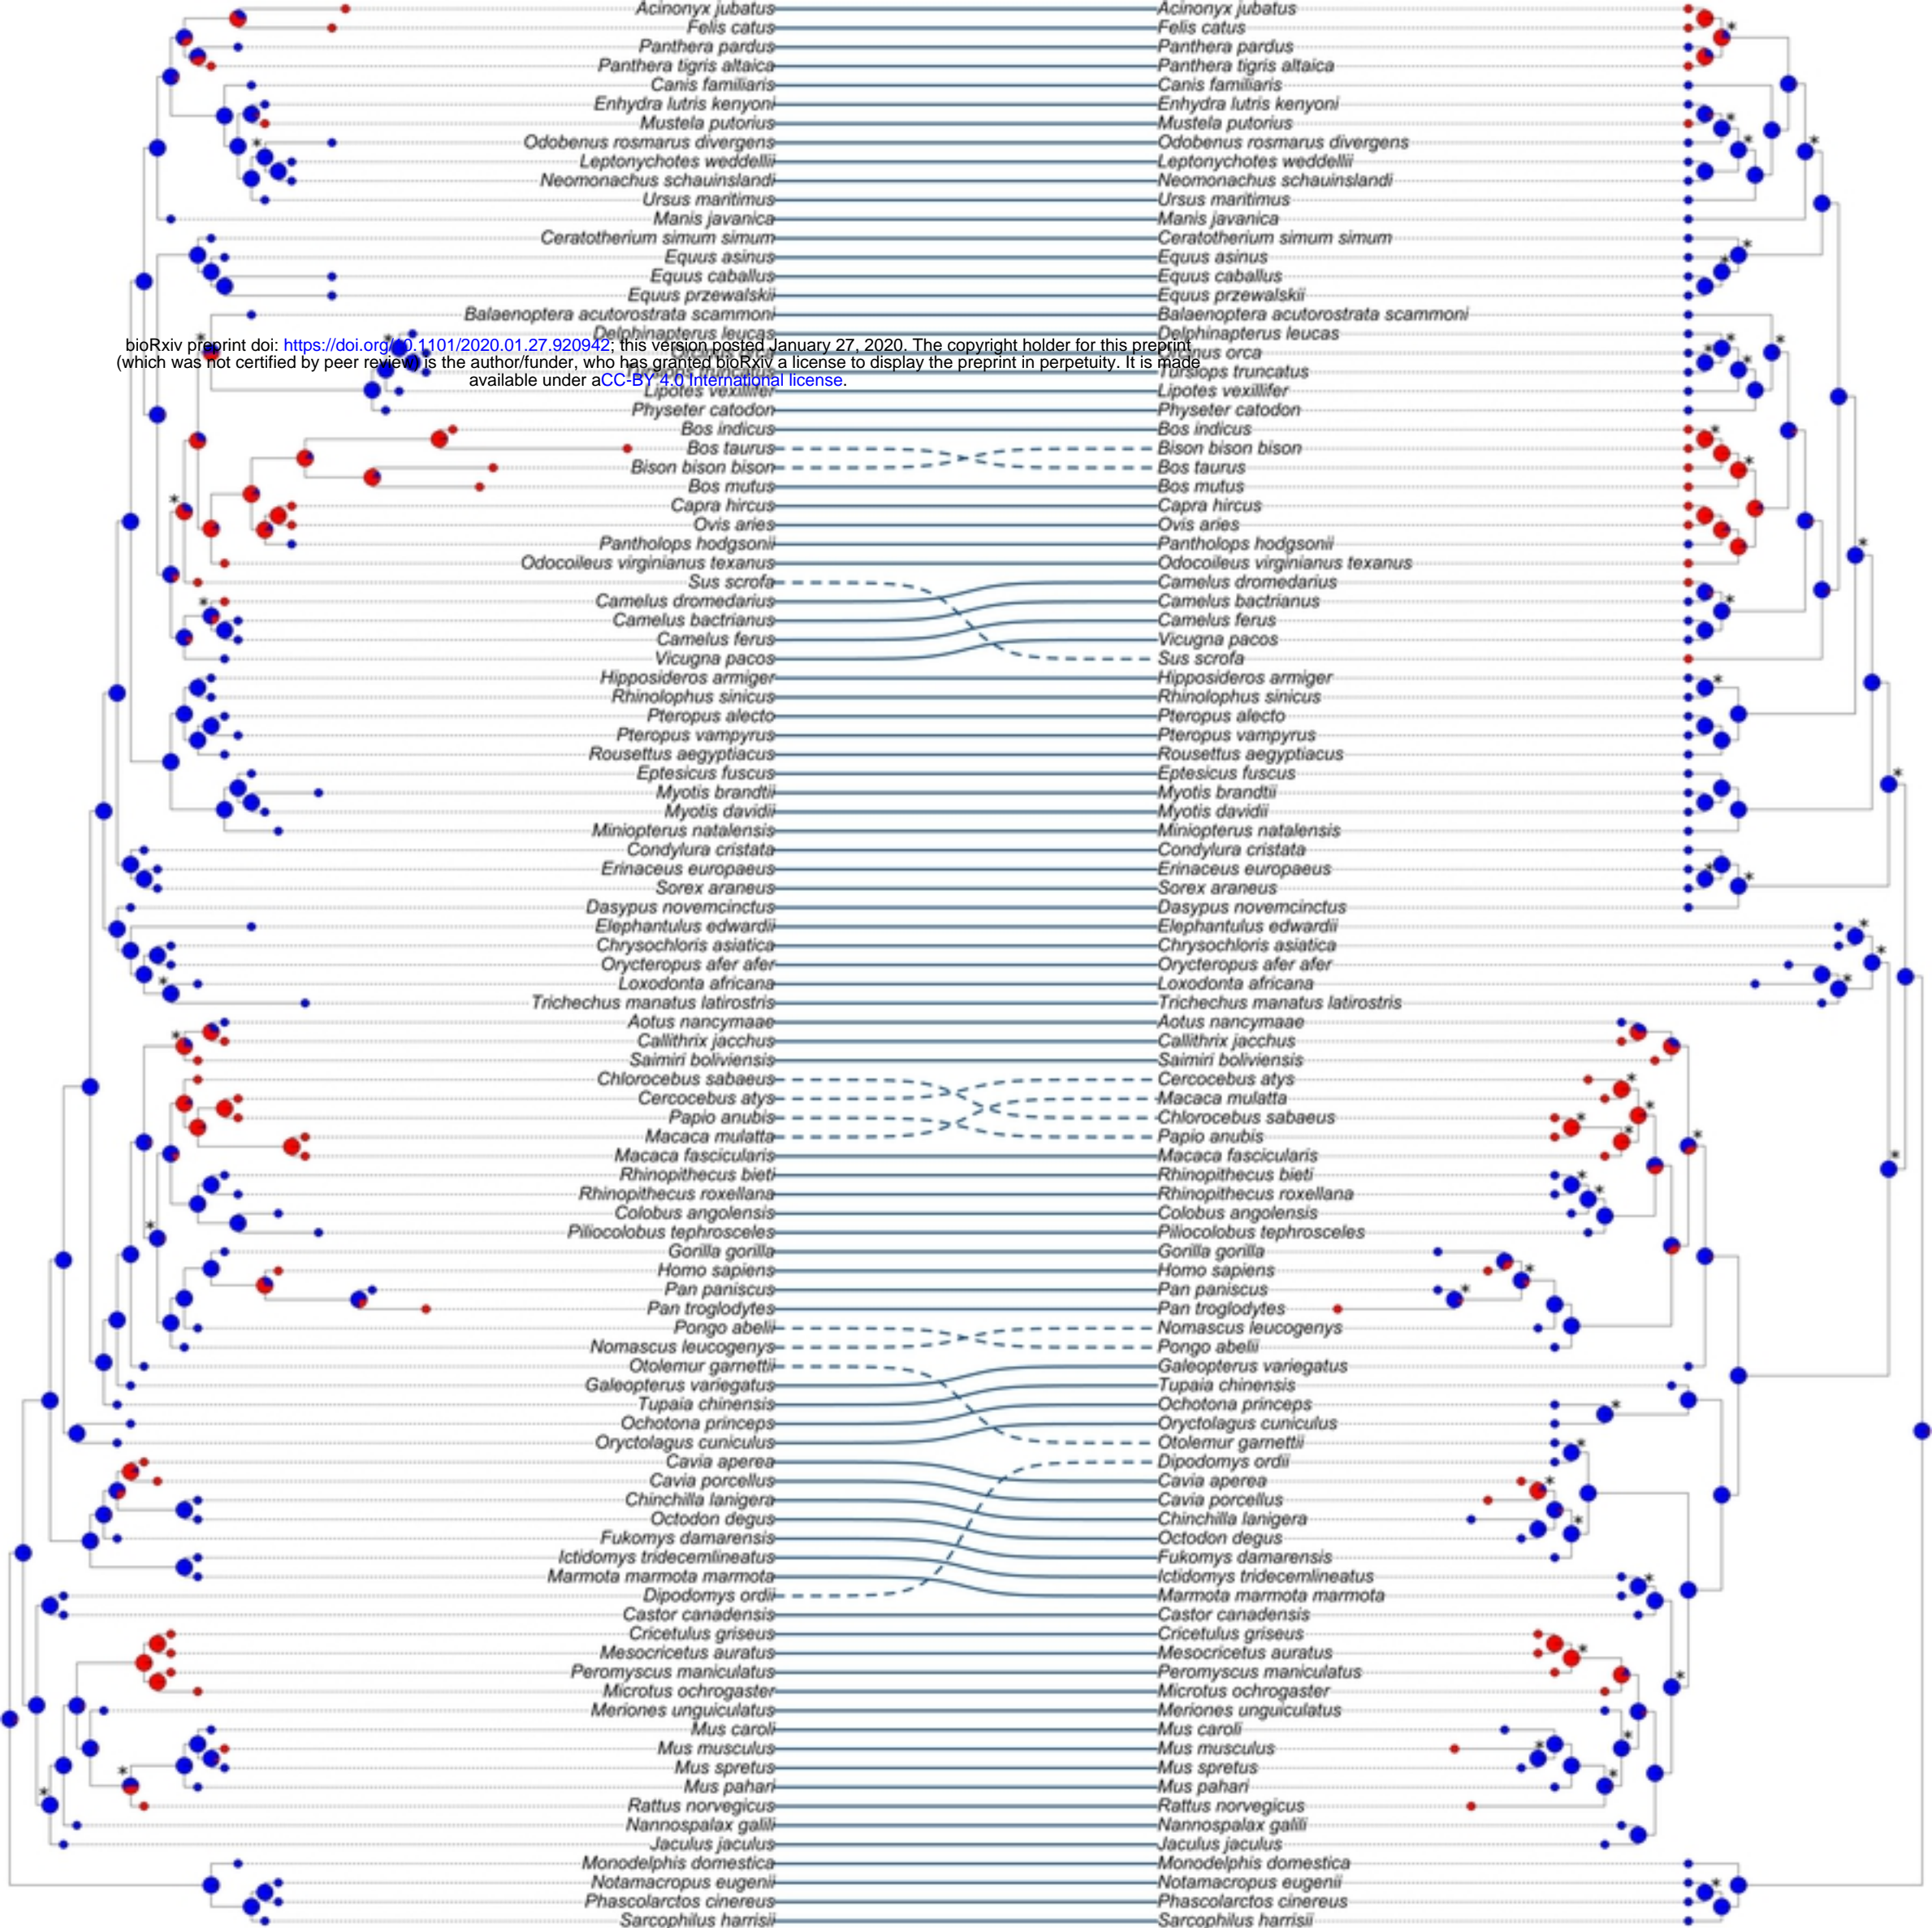

Figure 1

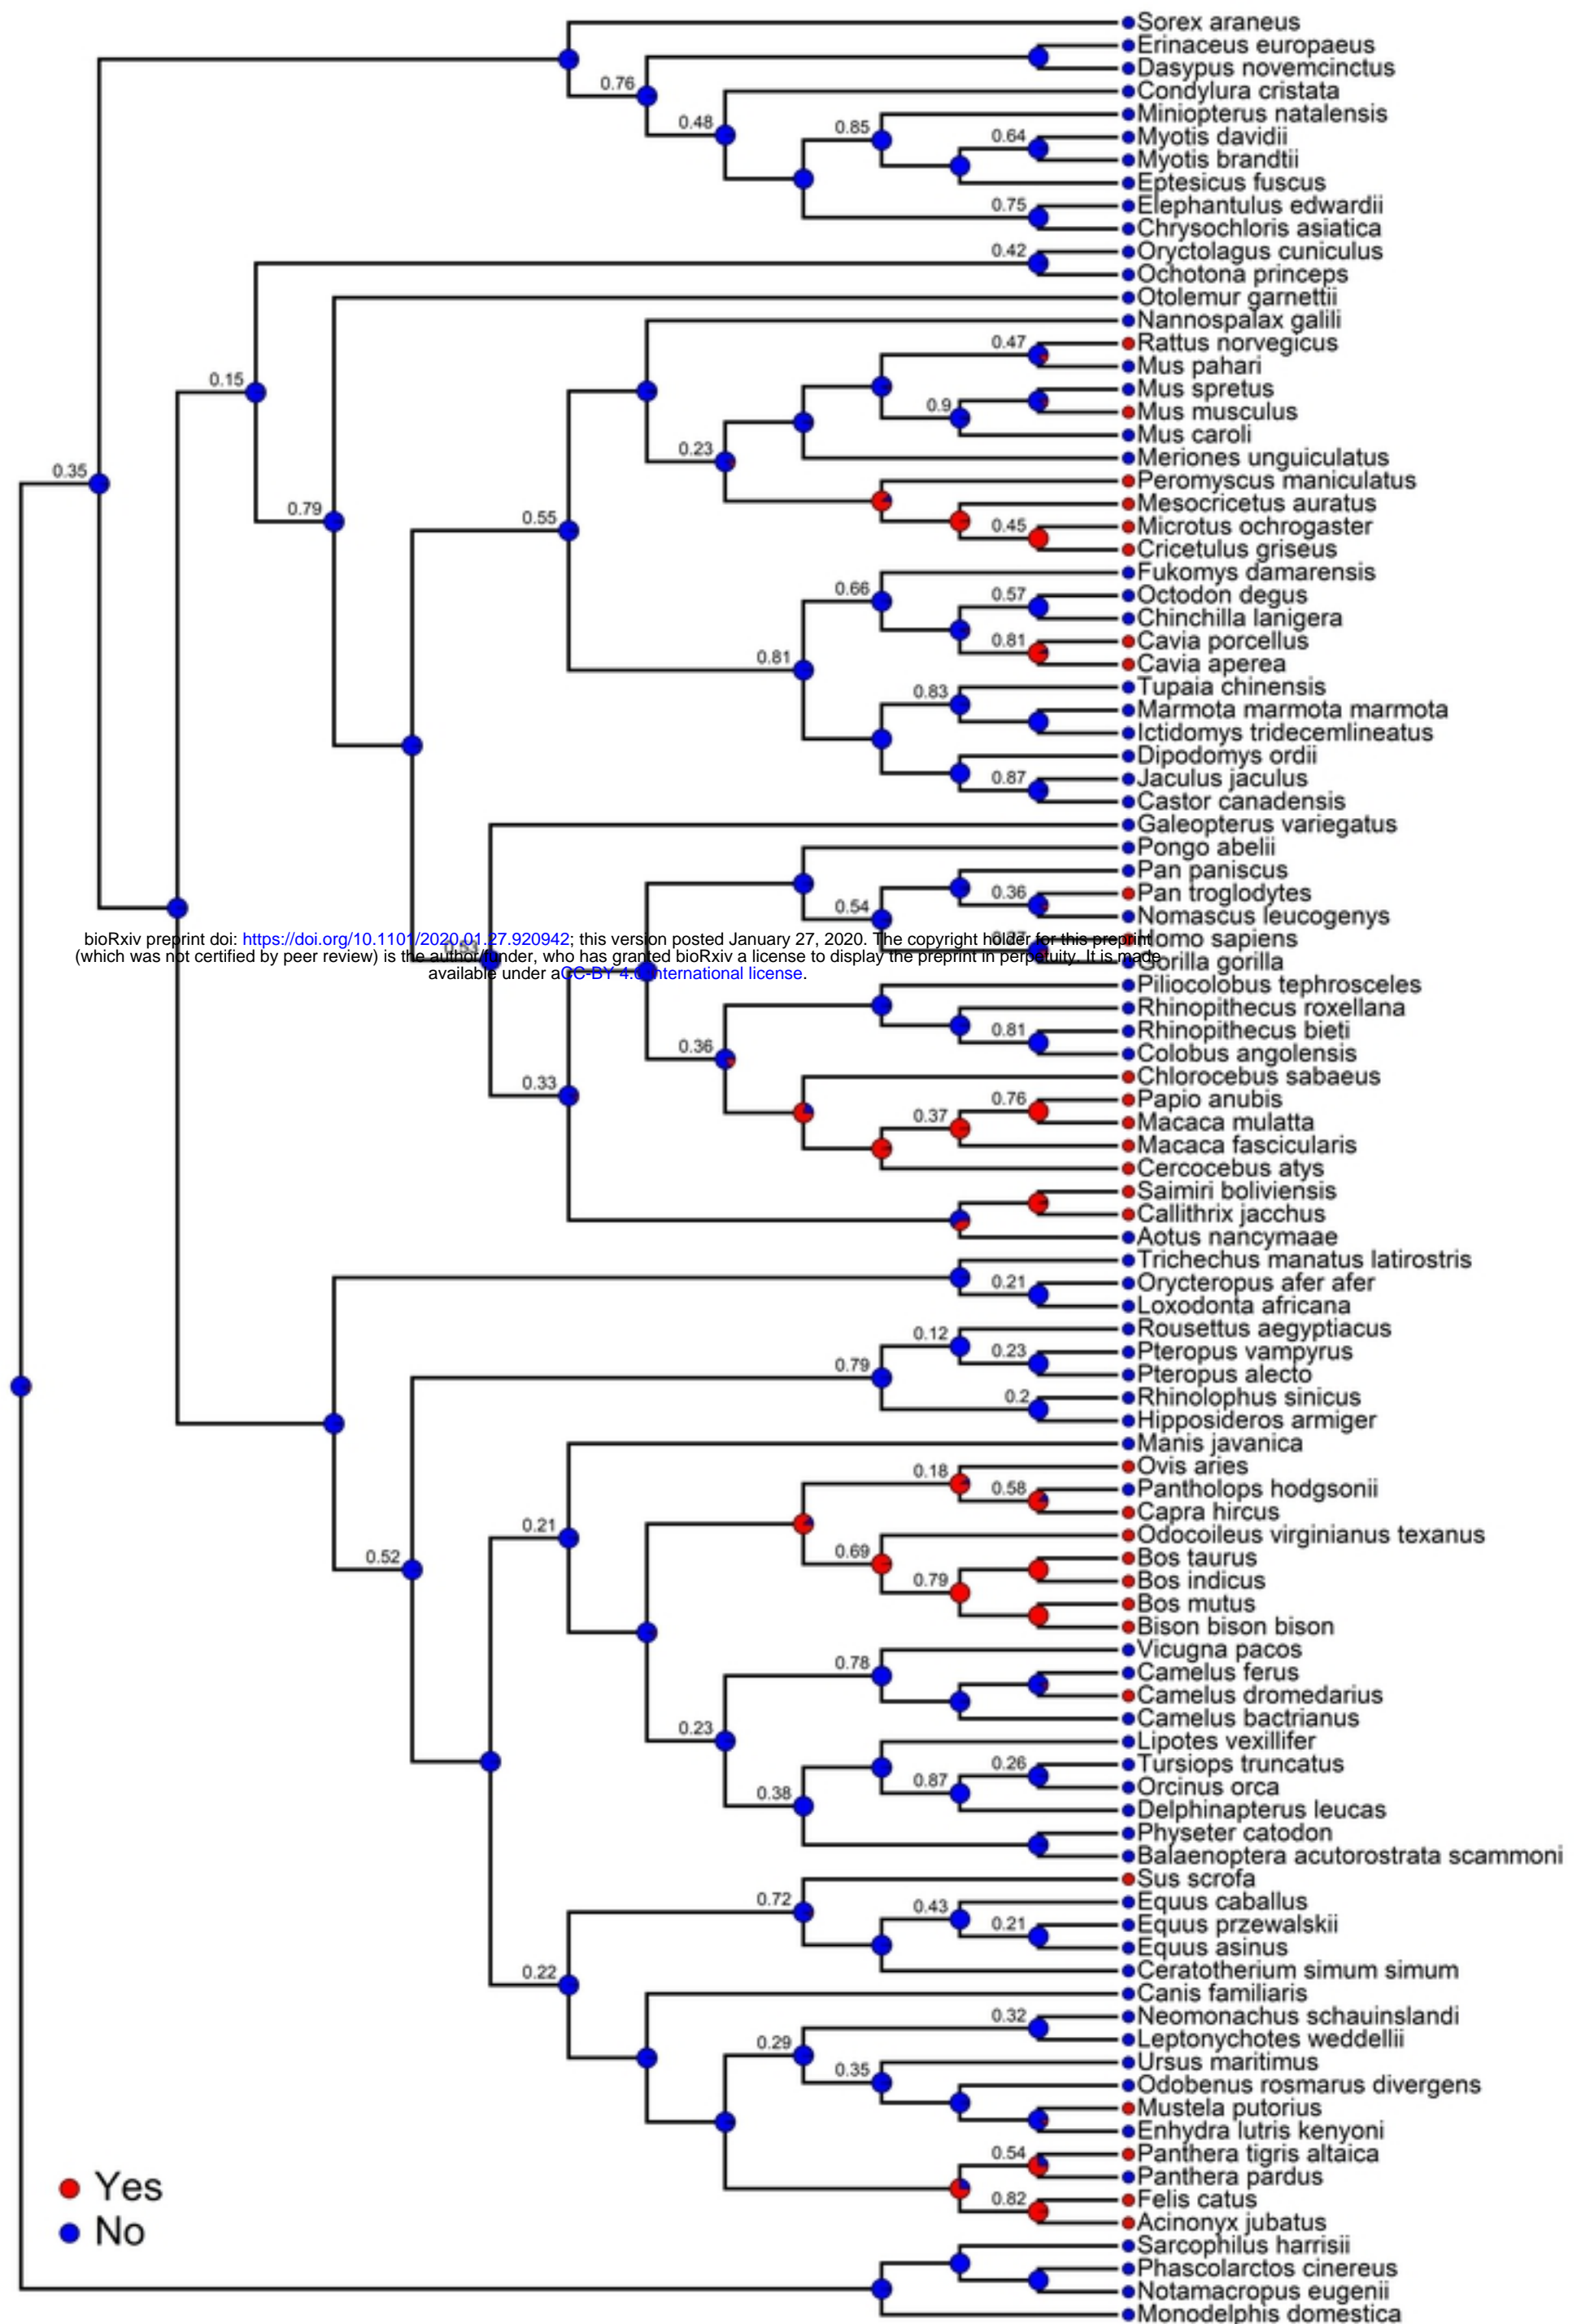

Figure 2

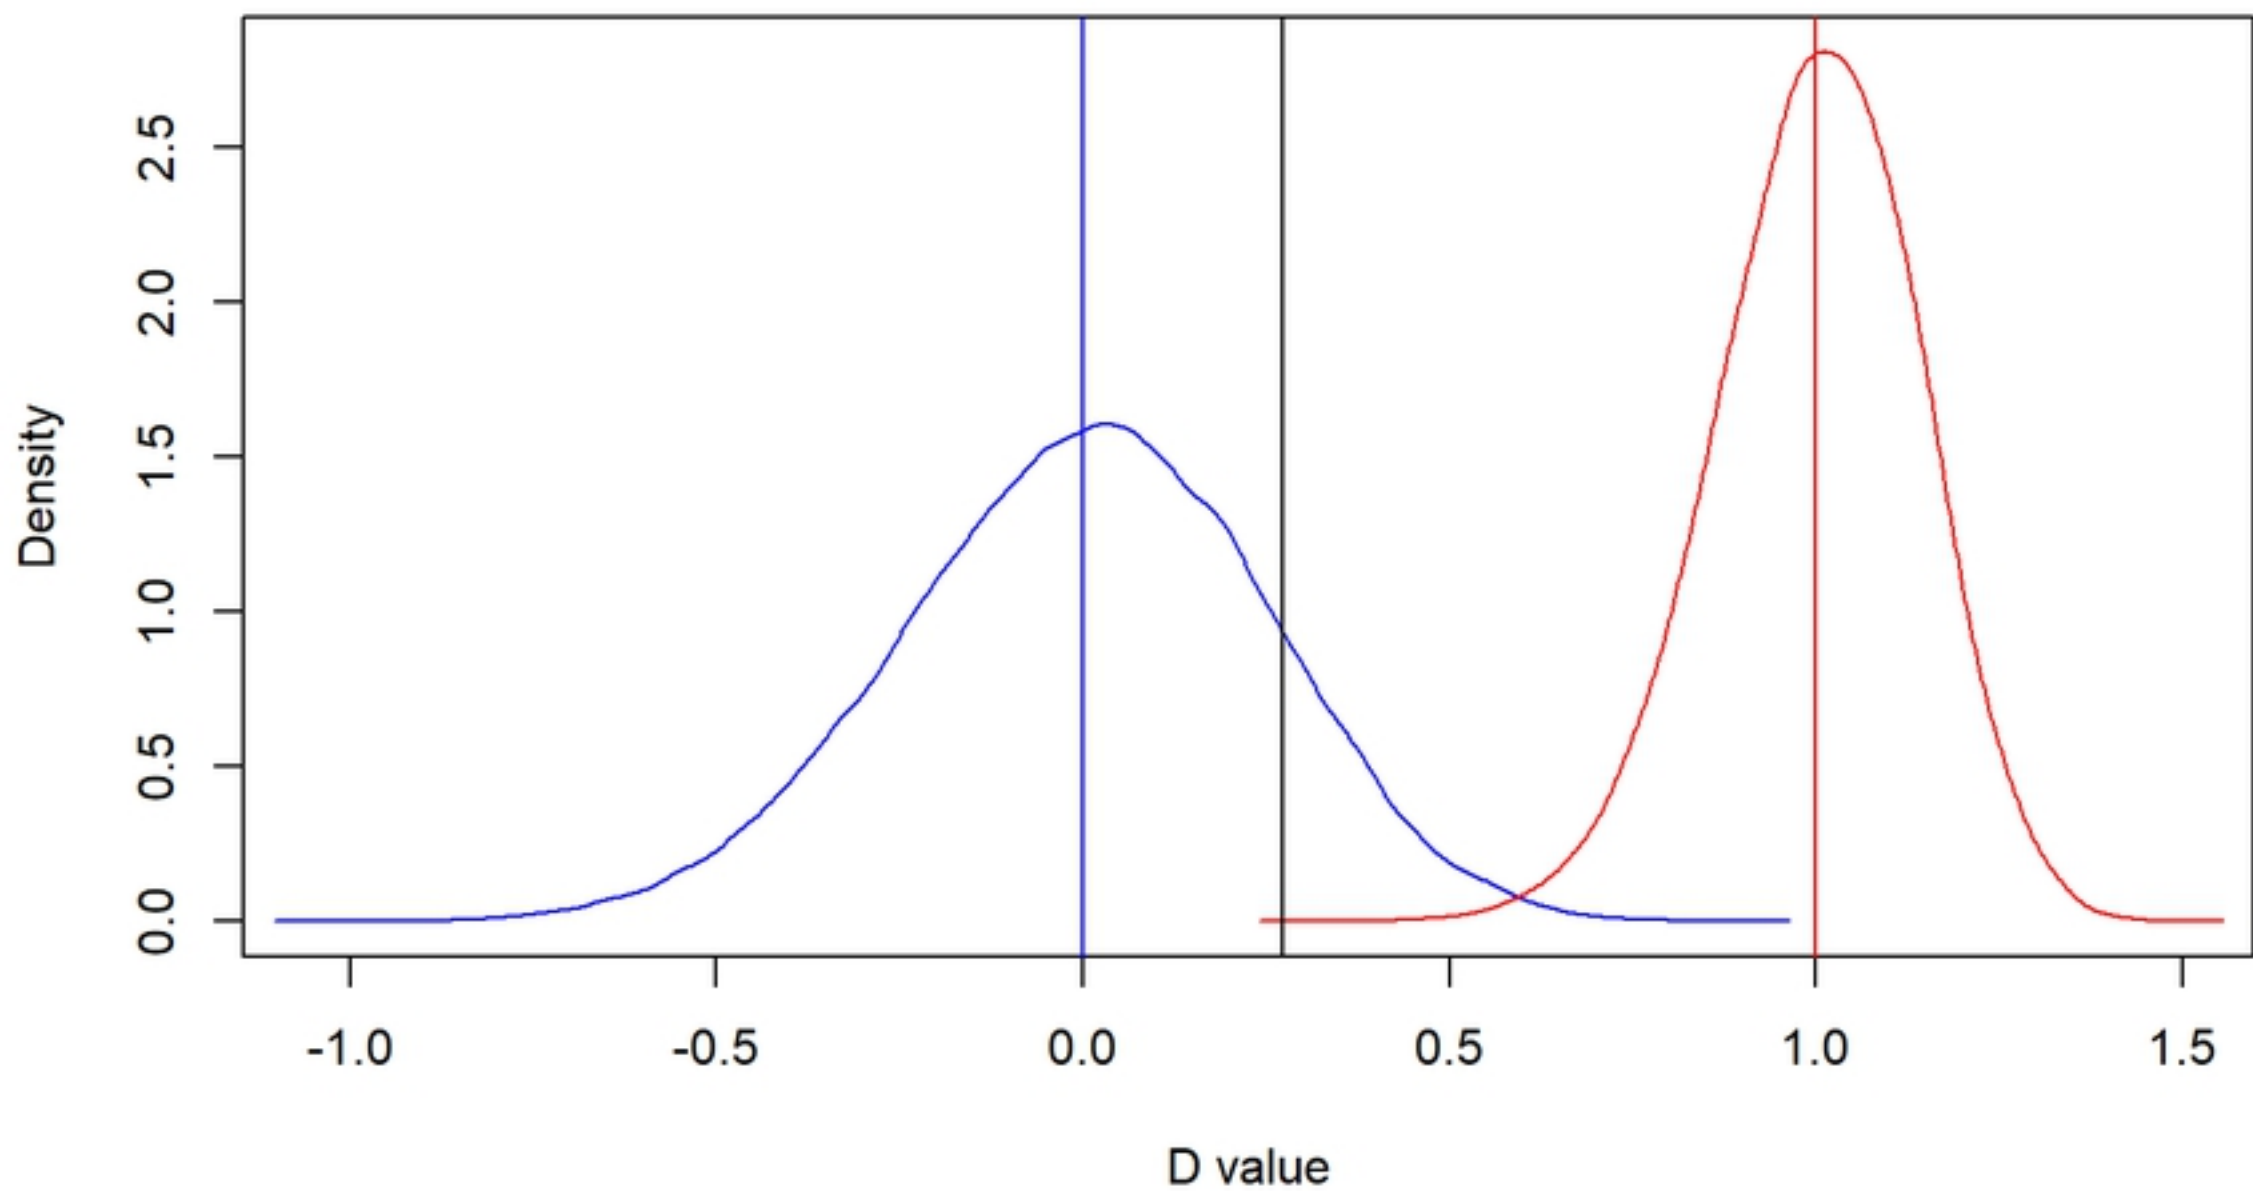

Figure 3
